# Supplementary material for: The analysis of GSTA1 promoter genetic and functional diversity of human populations
Source: PubMed Central journal article supplement (PMC7930039; doi:10.1038/s41598-021-83996-2), 2021-03-03
Supplement: 41598_2021_83996_MOESM1_ESM.pdf [file 41598_2021_83996_MOESM1_ESM.pdf]

# **The analysis of GSTA1 promoter genetic and functional diversity of human populations**

Vid Mlakar, Patricia Huezo-Diaz Curtis, Marc Armengol, Victor Ythier, Isabelle Dupanloup, Khalil Ben Hassine, Laurence Lesne, Rabih Murr, Simona Jurkovic Mlakar, Tiago Nava, Marc Ansari

## **Supplementary Material**

**Supplementary Figure 1. Pairwise FST analysis of human sub-populations - distances**

|             |     |    | African |       |        |        |        |        |       | European |        |        |        |       | East Asian |        |        |        |       | South Asian |        |        |        |       | American |       |       |       |
|-------------|-----|----|---------|-------|--------|--------|--------|--------|-------|----------|--------|--------|--------|-------|------------|--------|--------|--------|-------|-------------|--------|--------|--------|-------|----------|-------|-------|-------|
|             |     |    | ACB     | ASW   | ESN    | GWD    | LWK    | MSL    | YRI   | CEU      | FIN    | GBR    | IBS    | TSI   | CDX        | CHB    | CHS    | JPT    | KHV   | BEB         | GIH    | ITU    | PJL    | STU   | CLM      | MXL   | PEL   | PUR   |
|             |     |    | 1       | 2     | 3      | 4      | 5      | 6      | 7     | 8        | 9      | 10     | 11     | 12    | 13         | 14     | 15     | 16     | 17    | 18          | 19     | 20     | 21     | 22    | 23       | 24    | 25    | 26    |
| African     | ACB | 1  | 0,000   |       |        |        |        |        |       |          |        |        |        |       |            |        |        |        |       |             |        |        |        |       |          |       |       |       |
|             | ASW | 2  | -0,002  | 0,000 |        |        |        |        |       |          |        |        |        |       |            |        |        |        |       |             |        |        |        |       |          |       |       |       |
|             | ESN | 3  | -0,001  | 0,006 | 0,000  |        |        |        |       |          |        |        |        |       |            |        |        |        |       |             |        |        |        |       |          |       |       |       |
|             | GWD | 4  | 0,007   | 0,007 | 0,001  | 0,000  |        |        |       |          |        |        |        |       |            |        |        |        |       |             |        |        |        |       |          |       |       |       |
|             | LWK | 5  | 0,006   | 0,009 | 0,000  | -0,003 | 0,000  |        |       |          |        |        |        |       |            |        |        |        |       |             |        |        |        |       |          |       |       |       |
|             | MSL | 6  | 0,007   | 0,009 | 0,000  | -0,004 | -0,005 | 0,000  |       |          |        |        |        |       |            |        |        |        |       |             |        |        |        |       |          |       |       |       |
|             | YRI | 7  | 0,000   | 0,002 | -0,003 | -0,003 | -0,001 | -0,003 | 0,000 |          |        |        |        |       |            |        |        |        |       |             |        |        |        |       |          |       |       |       |
| European    | CEU | 8  | 0,117   | 0,085 | 0,152  | 0,159  | 0,164  | 0,161  | 0,144 | 0,000    |        |        |        |       |            |        |        |        |       |             |        |        |        |       |          |       |       |       |
|             | FIN | 9  | 0,119   | 0,090 | 0,153  | 0,164  | 0,171  | 0,166  | 0,146 | 0,004    | 0,000  |        |        |       |            |        |        |        |       |             |        |        |        |       |          |       |       |       |
|             | GBR | 10 | 0,121   | 0,090 | 0,156  | 0,167  | 0,173  | 0,169  | 0,149 | -0,002   | -0,003 | 0,000  |        |       |            |        |        |        |       |             |        |        |        |       |          |       |       |       |
|             | IBS | 11 | 0,092   | 0,065 | 0,124  | 0,131  | 0,138  | 0,135  | 0,116 | 0,000    | 0,001  | -0,002 | 0,000  |       |            |        |        |        |       |             |        |        |        |       |          |       |       |       |
|             | TSI | 12 | 0,106   | 0,077 | 0,139  | 0,147  | 0,153  | 0,150  | 0,131 | -0,002   | 0,001  | -0,003 | -0,004 | 0,000 |            |        |        |        |       |             |        |        |        |       |          |       |       |       |
| East Asian  | CDX | 13 | 0,126   | 0,091 | 0,142  | 0,117  | 0,120  | 0,120  | 0,125 | 0,125    | 0,158  | 0,153  | 0,129  | 0,139 | 0,000      |        |        |        |       |             |        |        |        |       |          |       |       |       |
|             | CHB | 14 | 0,151   | 0,115 | 0,170  | 0,145  | 0,147  | 0,148  | 0,153 | 0,135    | 0,175  | 0,167  | 0,144  | 0,152 | -0,002     | 0,000  |        |        |       |             |        |        |        |       |          |       |       |       |
|             | CHS | 15 | 0,124   | 0,089 | 0,143  | 0,122  | 0,124  | 0,124  | 0,127 | 0,107    | 0,142  | 0,135  | 0,115  | 0,123 | -0,003     | -0,001 | 0,000  |        |       |             |        |        |        |       |          |       |       |       |
|             | JPT | 16 | 0,140   | 0,104 | 0,158  | 0,134  | 0,136  | 0,137  | 0,141 | 0,127    | 0,165  | 0,158  | 0,135  | 0,144 | -0,004     | -0,004 | -0,003 | 0,000  |       |             |        |        |        |       |          |       |       |       |
|             | KHV | 17 | 0,117   | 0,082 | 0,133  | 0,109  | 0,112  | 0,112  | 0,116 | 0,115    | 0,147  | 0,142  | 0,119  | 0,128 | -0,005     | 0,000  | -0,004 | -0,003 | 0,000 |             |        |        |        |       |          |       |       |       |
| South Asian | BEB | 18 | 0,071   | 0,042 | 0,096  | 0,096  | 0,104  | 0,100  | 0,086 | 0,017    | 0,016  | 0,020  | 0,012  | 0,018 | 0,080      | 0,100  | 0,069  | 0,089  | 0,071 | 0,000       |        |        |        |       |          |       |       |       |
|             | GIH | 19 | 0,069   | 0,040 | 0,095  | 0,093  | 0,099  | 0,097  | 0,084 | 0,011    | 0,022  | 0,018  | 0,008  | 0,013 | 0,065      | 0,078  | 0,054  | 0,070  | 0,057 | 0,001       | 0,000  |        |        |       |          |       |       |       |
|             | ITU | 20 | 0,072   | 0,045 | 0,096  | 0,099  | 0,106  | 0,103  | 0,088 | 0,018    | 0,013  | 0,017  | 0,010  | 0,017 | 0,092      | 0,112  | 0,081  | 0,101  | 0,082 | -0,005      | 0,004  | 0,000  |        |       |          |       |       |       |
|             | PJL | 21 | 0,092   | 0,060 | 0,121  | 0,121  | 0,125  | 0,123  | 0,111 | 0,009    | 0,022  | 0,019  | 0,013  | 0,017 | 0,065      | 0,075  | 0,051  | 0,068  | 0,057 | 0,003       | -0,001 | 0,006  | 0,000  |       |          |       |       |       |
|             | STU | 22 | 0,084   | 0,054 | 0,110  | 0,111  | 0,116  | 0,113  | 0,101 | 0,013    | 0,016  | 0,018  | 0,013  | 0,018 | 0,075      | 0,091  | 0,063  | 0,081  | 0,066 | -0,004      | 0,001  | -0,002 | -0,002 | 0,000 |          |       |       |       |
| American    | CLM | 23 | 0,096   | 0,065 | 0,129  | 0,132  | 0,136  | 0,134  | 0,120 | -0,001   | 0,016  | 0,008  | 0,005  | 0,005 | 0,087      | 0,096  | 0,072  | 0,089  | 0,079 | 0,011       | 0,001  | 0,014  | 0,000  | 0,007 | 0,000    |       |       |       |
|             | MXL | 24 | 0,117   | 0,080 | 0,149  | 0,141  | 0,144  | 0,144  | 0,136 | 0,035    | 0,072  | 0,058  | 0,046  | 0,047 | 0,042      | 0,041  | 0,030  | 0,040  | 0,038 | 0,041       | 0,017  | 0,050  | 0,016  | 0,034 | 0,014    | 0,000 |       |       |
|             | PEL | 25 | 0,227   | 0,187 | 0,264  | 0,255  | 0,255  | 0,257  | 0,251 | 0,100    | 0,154  | 0,135  | 0,128  | 0,126 | 0,079      | 0,061  | 0,062  | 0,066  | 0,078 | 0,124       | 0,089  | 0,134  | 0,074  | 0,104 | 0,073    | 0,025 | 0,000 |       |
|             | PUR | 26 | 0,067   | 0,041 | 0,096  | 0,098  | 0,103  | 0,102  | 0,088 | 0,006    | 0,022  | 0,014  | 0,005  | 0,007 | 0,082      | 0,093  | 0,070  | 0,086  | 0,074 | 0,010       | -0,001 | 0,013  | 0,005  | 0,010 | -0,001   | 0,016 | 0,087 | 0,000 |

**Supplementary Figure 1.** Pairwise FST analysis of human sub-populations – significance indicator

|             |     | African |     |     |     |     |     |     | European |     |     |     |     | East Asian |     |     |     | South Asian |     |     |     |     | American |     |     |     |     |   |   |   |   |
|-------------|-----|---------|-----|-----|-----|-----|-----|-----|----------|-----|-----|-----|-----|------------|-----|-----|-----|-------------|-----|-----|-----|-----|----------|-----|-----|-----|-----|---|---|---|---|
|             |     | ACB     | ASW | ESN | GWD | LWK | MSL | YRI | CEU      | FIN | GBR | IBS | TSI | CDX        | CHB | CHS | JPT | KHV         | BEB | GIH | ITU | PJL | STU      | CLM | MXL | PEL | PUR |   |   |   |   |
|             |     | 1       | 2   | 3   | 4   | 5   | 6   | 7   | 8        | 9   | 10  | 11  | 12  | 13         | 14  | 15  | 16  | 17          | 18  | 19  | 20  | 21  | 22       | 23  | 24  | 25  | 26  |   |   |   |   |
| African     | ACB | 1       | -   | -   | -   | -   | -   | -   | +        | +   | +   | +   | +   | +          | +   | +   | +   | +           | +   | +   | +   | +   | +        | +   | +   | +   | +   |   |   |   |   |
|             | ASW | 2       | -   | -   | -   | -   | -   | -   | +        | +   | +   | +   | +   | +          | +   | +   | +   | +           | +   | +   | +   | +   | +        | +   | +   | +   | +   | + |   |   |   |
|             | ESN | 3       | -   | -   | -   | -   | -   | -   | +        | +   | +   | +   | +   | +          | +   | +   | +   | +           | +   | +   | +   | +   | +        | +   | +   | +   | +   | + | + |   |   |
|             | GWD | 4       | -   | -   | -   | -   | -   | -   | +        | +   | +   | +   | +   | +          | +   | +   | +   | +           | +   | +   | +   | +   | +        | +   | +   | +   | +   | + | + |   |   |
|             | LWK | 5       | -   | -   | -   | -   | -   | -   | +        | +   | +   | +   | +   | +          | +   | +   | +   | +           | +   | +   | +   | +   | +        | +   | +   | +   | +   | + | + |   |   |
|             | MSL | 6       | -   | -   | -   | -   | -   | -   | +        | +   | +   | +   | +   | +          | +   | +   | +   | +           | +   | +   | +   | +   | +        | +   | +   | +   | +   | + | + | + |   |
|             | YRI | 7       | -   | -   | -   | -   | -   | -   | +        | +   | +   | +   | +   | +          | +   | +   | +   | +           | +   | +   | +   | +   | +        | +   | +   | +   | +   | + | + | + |   |
| European    | CEU | 8       | +   | +   | +   | +   | +   | +   | -        | -   | -   | -   | -   | +          | +   | +   | +   | +           | +   | -   | +   | -   | +        | -   | +   | +   | +   | - |   |   |   |
|             | FIN | 9       | +   | +   | +   | +   | +   | +   | -        | -   | -   | -   | -   | +          | +   | +   | +   | +           | +   | +   | +   | +   | +        | +   | +   | +   | +   | + | + |   |   |
|             | GBR | 10      | +   | +   | +   | +   | +   | +   | -        | -   | -   | -   | -   | +          | +   | +   | +   | +           | +   | +   | +   | +   | +        | -   | +   | +   | +   | + | + |   |   |
|             | IBS | 11      | +   | +   | +   | +   | +   | +   | -        | -   | -   | -   | -   | +          | +   | +   | +   | +           | -   | -   | -   | +   | -        | -   | +   | +   | +   | - | - |   |   |
|             | TSI | 12      | +   | +   | +   | +   | +   | +   | -        | -   | -   | -   | -   | +          | +   | +   | +   | +           | +   | +   | +   | +   | +        | -   | +   | +   | +   | - | - |   |   |
| East Asian  | CDX | 13      | +   | +   | +   | +   | +   | +   | +        | +   | +   | +   | +   | -          | -   | -   | -   | -           | +   | +   | +   | +   | +        | +   | +   | +   | +   | + | + |   |   |
|             | CHB | 14      | +   | +   | +   | +   | +   | +   | +        | +   | +   | +   | +   | -          | -   | -   | -   | -           | +   | +   | +   | +   | +        | +   | +   | +   | +   | + | + | + |   |
|             | CHS | 15      | +   | +   | +   | +   | +   | +   | +        | +   | +   | +   | +   | -          | -   | -   | -   | -           | +   | +   | +   | +   | +        | +   | +   | +   | +   | + | + | + | + |
|             | JPT | 16      | +   | +   | +   | +   | +   | +   | +        | +   | +   | +   | +   | -          | -   | -   | -   | -           | +   | +   | +   | +   | +        | +   | +   | +   | +   | + | + | + | + |
|             | KHV | 17      | +   | +   | +   | +   | +   | +   | +        | +   | +   | +   | +   | +          | -   | -   | -   | -           | +   | +   | +   | +   | +        | +   | +   | +   | +   | + | + | + | + |
| South Asian | BEB | 18      | +   | +   | +   | +   | +   | +   | +        | +   | +   | -   | +   | +          | +   | +   | +   | +           | +   | -   | -   | -   | -        | -   | +   | +   | +   | - | - |   |   |
|             | GIH | 19      | +   | +   | +   | +   | +   | +   | -        | +   | +   | -   | +   | +          | +   | +   | +   | +           | +   | -   | -   | -   | -        | -   | +   | +   | +   | - | - |   |   |
|             | ITU | 20      | +   | +   | +   | +   | +   | +   | +        | +   | +   | -   | +   | +          | +   | +   | +   | +           | +   | -   | -   | -   | -        | +   | +   | +   | +   | + | + | + | + |
|             | PJL | 21      | +   | +   | +   | +   | +   | +   | -        | +   | +   | +   | +   | +          | +   | +   | +   | +           | +   | -   | -   | -   | -        | -   | -   | -   | +   | - | - |   |   |
|             | STU | 22      | +   | +   | +   | +   | +   | +   | +        | +   | +   | -   | +   | +          | +   | +   | +   | +           | +   | -   | -   | -   | -        | -   | +   | +   | +   | - | - |   |   |
| American    | CLM | 23      | +   | +   | +   | +   | +   | +   | -        | +   | -   | -   | -   | +          | +   | +   | +   | +           | +   | -   | -   | +   | -        | -   | -   | +   | -   | - |   |   |   |
|             | MXL | 24      | +   | +   | +   | +   | +   | +   | +        | +   | +   | +   | +   | +          | +   | +   | +   | +           | +   | +   | +   | +   | -        | +   | -   | +   | +   | + | + |   |   |
|             | PEL | 25      | +   | +   | +   | +   | +   | +   | +        | +   | +   | +   | +   | +          | +   | +   | +   | +           | +   | +   | +   | +   | +        | +   | +   | +   | +   | + | + | + |   |
|             | PUR | 26      | +   | +   | +   | +   | +   | +   | -        | +   | +   | -   | -   | +          | +   | +   | +   | +           | +   | -   | -   | +   | -        | -   | -   | +   | +   | + | + |   |   |

plus -  $p < 0,05$ , minus -  $p > 0,05$



**Supplementary Figure 2.** Genotyping of 1000 Genomes Project samples with unknown diplotypes.

| Sample  | Our result |     |      |      |      |       | 1000 Genomes |     |      |      |      |       | Diplotype |
|---------|------------|-----|------|------|------|-------|--------------|-----|------|------|------|-------|-----------|
|         | -52        | -69 | -513 | -567 | -631 | -1142 | -52          | -69 | -513 | -567 | -631 | -1142 |           |
| HG00437 | G          | C   | A    | T    | T    | C     | A            | T   | A    | T    | T    | C     | *A1       |
|         | A          | T   | G    | G    | G    | G     | A            | T   | G    | G    | G    | G     | *B1b      |
| HG01384 | G          | C   | A    | T    | T    | C     | A            | T   | A    | T    | T    | C     | *A1       |
|         | A          | T   | A    | G    | G    | G     | A            | T   | A    | G    | G    | G     | *B1a      |
| HG02479 | G          | C   | A    | T    | T    | C     | A            | T   | A    | T    | T    | C     | *A1       |
|         | A          | T   | A    | G    | G    | C     | A            | T   | A    | G    | G    | C     | *B2       |
| HG03767 | G          | C   | A    | T    | T    | C     | A            | T   | A    | T    | T    | C     | *A1       |
|         | A          | T   | A    | G    | G    | G     | A            | T   | A    | G    | G    | G     | *B1a      |
| NA19064 | G          | C   | A    | T    | T    | C     | A            | T   | A    | T    | T    | C     | *A1       |
|         | A          | T   | G    | G    | G    | G     | A            | T   | G    | G    | G    | G     | *B1b      |
| NA19916 | G          | C   | A    | T    | G    | C     | G            | C   | A    | T    | G    | C     | *A2       |
|         | A          | T   | A    | G    | G    | C     | G            | C   | A    | G    | G    | C     | *B2       |
| HG03127 | G          | C   | A    | T    | G    | C     | G            | T   | A    | T    | G    | C     | *A2       |
|         | A          | T   | A    | G    | G    | C     | A            | T   | A    | G    | G    | C     | *B2       |
| NA18910 | G          | C   | A    | T    | G    | C     | G            | T   | A    | T    | G    | C     | *A2       |
|         | A          | T   | A    | G    | G    | C     | A            | T   | A    | G    | G    | C     | *B2       |

**Supplementary Figure 3.** Comparison of LRA expression in equimolar plasmid mixtures.

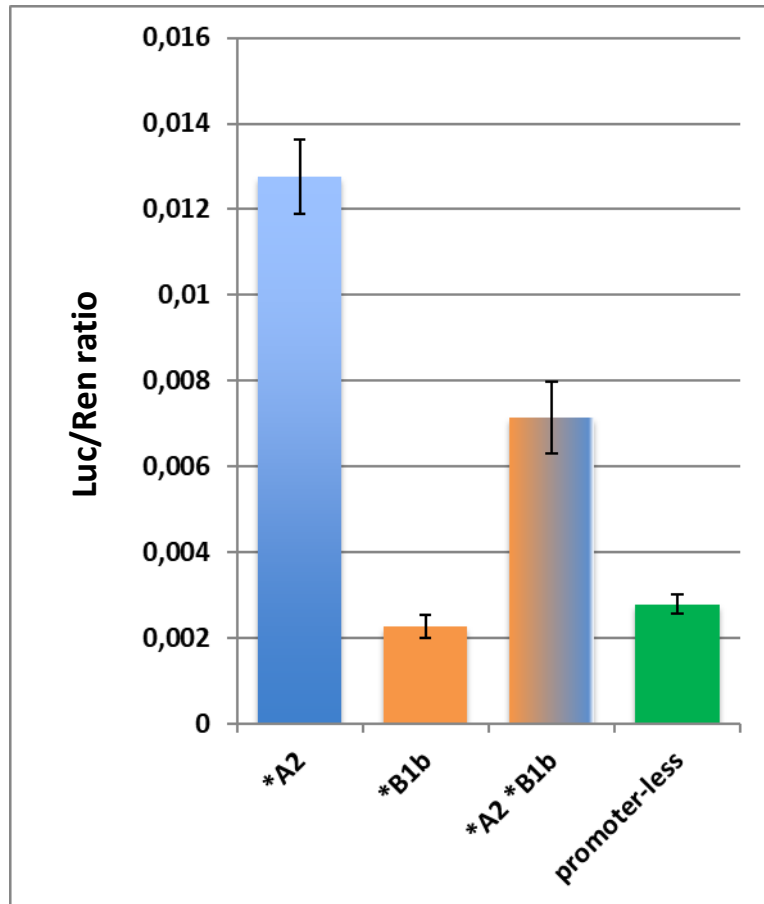

# Supplementary Figure 4. TOPO PCR cloning for exact resolution of ambiguous haplotypes.

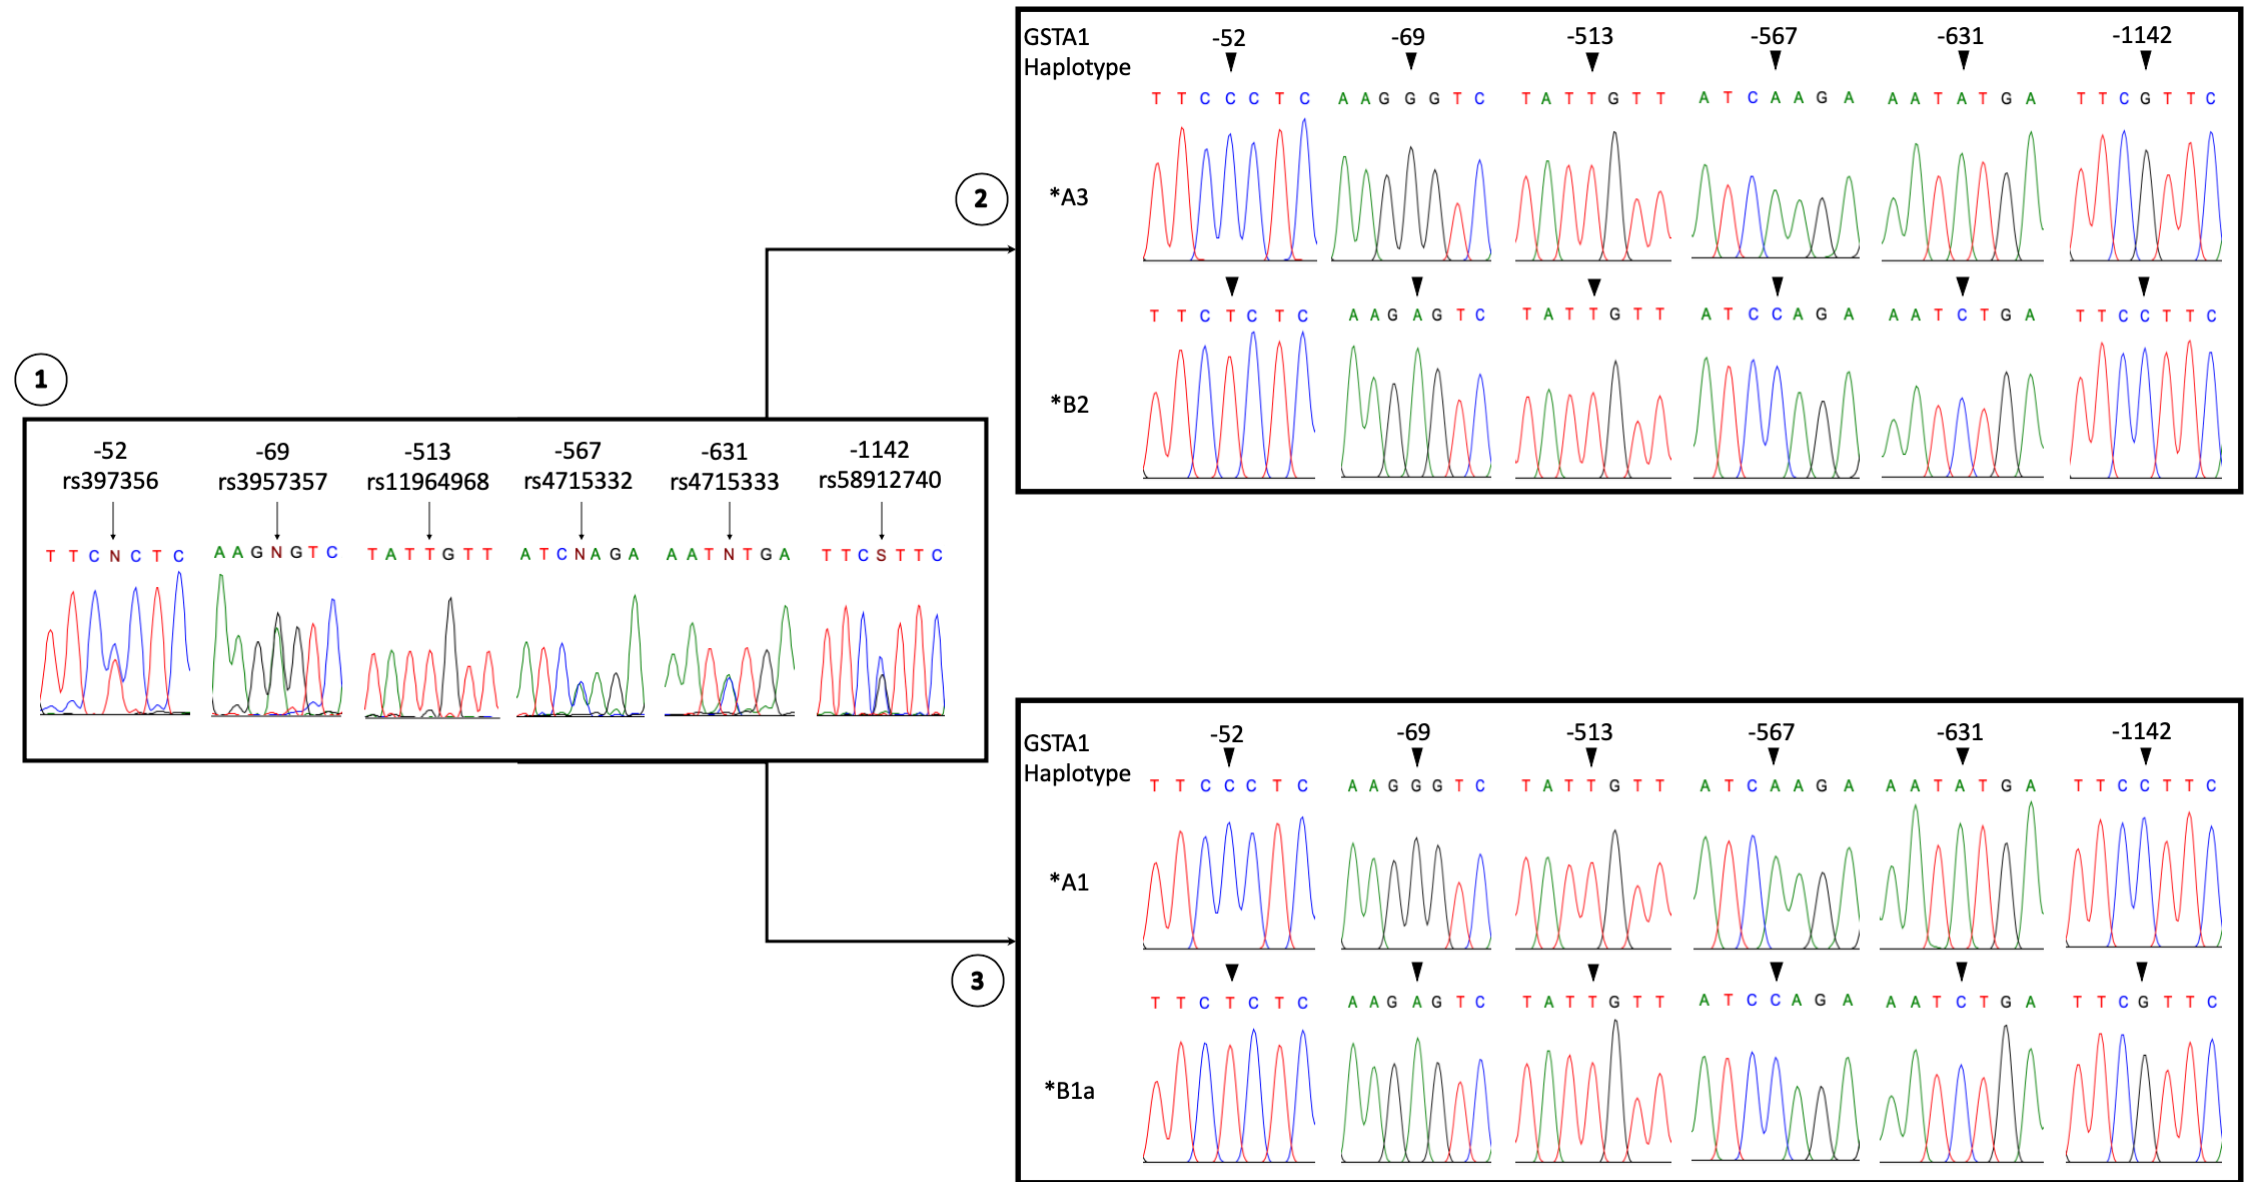

## Supplementary Figure 5. Transcription factors binding at a specific position.

| Position         | pwmname     | Allel | Score | Allel | Score |
|------------------|-------------|-------|-------|-------|-------|
| <b>-52 / -69</b> | SIX1        | GC    | 7,80  | AT    | 6,32  |
|                  | RARA::RXRG  | GC    | 13,40 | AT    |       |
|                  | E2F6        | GC    | 12,22 | AT    |       |
|                  | SP1         | GC    | 11,21 | AT    |       |
|                  | NR2F1       | GC    | 10,96 | AT    |       |
|                  | Pparg::Rxra | GC    | 10,09 | AT    |       |
|                  | KLF5        | GC    | 10,06 | AT    |       |
|                  | NR2F2       | GC    | 9,33  | AT    |       |
|                  | TFDP1       | GC    | 8,59  | AT    |       |
|                  | SP2         | GC    | 8,57  | AT    |       |
|                  | ZNF740      | GC    | 8,49  | AT    |       |
|                  | NR4A2       | GC    | 8,19  | AT    |       |
|                  | Nr2e1       | GC    | 7,88  | AT    |       |
|                  | SP3         | GC    | 7,45  | AT    |       |
|                  | RARA::RXRA  | GC    | 7,44  | AT    |       |
|                  | ZNF263      | GC    | 7,11  | AT    |       |
|                  | KLF16       | GC    | 6,64  | AT    |       |
|                  | ZBTB7C      | GC    | 6,31  | AT    |       |
|                  | MZF1(var.2) | GC    | 6,23  | AT    |       |
|                  | SP8         | GC    | 6,22  | AT    |       |
|                  | RORA        | GC    | 6,18  | AT    |       |
|                  | EGR4        | GC    | 6,16  | AT    |       |
|                  | VDR         | GC    | 6,13  | AT    |       |
|                  | Nr2e1       | GC    |       | AT    | 11,79 |
|                  | RARA::RXRG  | GC    |       | AT    | 7,22  |
|                  | SIX2        | GC    |       | AT    | 6,88  |
|                  | Pparg::Rxra | GC    |       | AT    | 6,87  |
|                  | ZBTB7C      | GC    |       | AT    | 6,78  |
|                  | Pax2        | GC    |       | AT    | 6,51  |

| Position    | pwmname     | Allel | Score | Allel | Score |
|-------------|-------------|-------|-------|-------|-------|
| <b>-567</b> | GATA1::TAL1 | T     | 10,76 | G     | 16,21 |
|             | FOSL1::JUNB | T     | 6,87  | G     | 7,15  |
|             | FOSL1::JUN  | T     | 6,17  | G     | 6,23  |
|             | FOSL2::JUN  | T     | 6,01  | G     | 6,14  |
|             | MAFF        | T     | 7,58  | G     |       |
|             | Nr2e1       | T     | 6,81  | G     |       |
|             | Nkx2-5      | T     | 6,81  | G     |       |
|             | MAFK        | T     | 6,63  | G     |       |
|             | Gfi1        | T     | 6,49  | G     |       |
|             | Six3        | T     | 6,39  | G     |       |
|             | RHOXF1      | T     |       | G     | 7,88  |
|             | PITX3       | T     |       | G     | 7,36  |
|             | HSF4        | T     |       | G     | 6,68  |
|             | Pitx1       | T     |       | G     | 6,61  |
|             | ZNF354C     | T     |       | G     | 6,23  |
|             | HNF4G       | T     |       | G     | 6,12  |

| Position    | pwmname | Allel | Score | Allel | Score |
|-------------|---------|-------|-------|-------|-------|
| <b>-631</b> | PRDM1   | G     | 11,25 | T     | 10,18 |
|             | IRF1    | G     | 10,79 | T     | 11,51 |
|             | IRF2    | G     | 9,63  | T     | 6,17  |
|             | SOX15   | G     | 7,88  | T     | 7,02  |
|             | SOX10   | G     | 6,39  | T     | 6,12  |
|             | Gfi1    | G     |       | T     | 8,83  |
|             | SIX1    | G     |       | T     | 7,54  |
|             | TCF7L2  | G     | 9,00  | T     |       |
|             | Arid5a  | G     | 7,67  | T     |       |
|             | LEF1    | G     | 7,48  | T     |       |
|             | FOXD2   | G     | 7,02  | T     |       |
|             | FOXC1   | G     | 6,83  | T     |       |
|             | FOXL1   | G     | 6,68  | T     |       |
|             | FOXC1   | G     | 6,57  | T     |       |
|             | Tcf7    | G     | 6,51  | T     |       |
|             | Dlx1    | G     | 6,47  | T     |       |
|             | FOXP3   | G     | 6,37  | T     |       |
|             | IRF7    | G     | 6,30  | T     |       |
|             | Arid5a  | G     | 6,14  | T     |       |
| FOXA1       | G       | 6,06  | T     |       |       |

| Position     | pwmname     | Allel | score | Allel | score |
|--------------|-------------|-------|-------|-------|-------|
| <b>-1142</b> | NR1A4::RXRA | G     | 6,602 | C     |       |
|              | NFIC::TLX1  | G     | 6,756 | C     |       |



## Supplementary Figure 5. Transcription factors binding at a specific position.

| Position | pwmname | Allel | Score | Allel | Score |
|----------|---------|-------|-------|-------|-------|
| -513     | CDX1    | G     | 6,08  | A     | 10,80 |
|          | HOXA13  | G     | 6,21  | A     | 10,96 |
|          | Hmx3    | G     | 6,30  | A     | 8,68  |
|          | Dlx1    | G     | 6,54  | A     | 6,76  |
|          | Hmx2    | G     | 6,73  | A     | 9,22  |
|          | ONECUT1 | G     | 6,81  | A     | 6,05  |
|          | RAX     | G     | 6,83  | A     | 6,58  |
|          | FOXK2   | G     | 6,85  | A     | 7,24  |
|          | FOXC1   | G     | 6,86  | A     | 8,57  |
|          | FOXF2   | G     | 7,10  | A     | 14,18 |
|          | FOXP3   | G     | 7,28  | A     | 10,82 |
|          | HOXA10  | G     | 7,29  | A     | 10,33 |
|          | FOXD2   | G     | 7,67  | A     | 10,73 |
|          | Hoxd8   | G     | 7,68  | A     | 12,18 |
|          | Foxd3   | G     | 7,75  | A     | 11,08 |
|          | Hoxd8   | G     | 8,00  | A     | 9,58  |
|          | BARHL2  | G     | 8,11  | A     | 7,71  |
|          | Hoxd9   | G     | 8,22  | A     | 10,64 |
|          | FOXC2   | G     | 8,68  | A     | 10,54 |
|          | GATA6   | G     | 8,77  | A     | 9,27  |
|          | CUX2    | G     | 9,37  | A     | 8,16  |
|          | FOXF2   | G     | 9,39  | A     | 8,03  |
|          | ONECUT2 | G     | 9,42  | A     | 8,69  |
|          | GATA2   | G     | 9,52  | A     | 10,18 |
|          | Gata1   | G     | 9,58  | A     | 10,65 |
|          | ONECUT3 | G     | 9,70  | A     | 10,59 |
|          | Foxj3   | G     | 11,45 | A     | 11,54 |
|          | BARHL2  | G     | 11,87 | A     | 8,84  |

continuation

|      |         |   |   |       |
|------|---------|---|---|-------|
| -513 | Foxj3   | G | A | 14,19 |
|      | Foxj2   | G | A | 13,58 |
|      | FOXG1   | G | A | 13,54 |
|      | FOXL1   | G | A | 12,01 |
|      | FOXP2   | G | A | 11,98 |
|      | Sox5    | G | A | 11,92 |
|      | SOX15   | G | A | 11,89 |
|      | SRY     | G | A | 11,79 |
|      | Foxq1   | G | A | 11,67 |
|      | CDX2    | G | A | 11,45 |
|      | FOXK2   | G | A | 11,21 |
|      | Hoxc9   | G | A | 11,20 |
|      | FOXO4   | G | A | 11,12 |
|      | FOXO6   | G | A | 11,06 |
|      | Hoxa9   | G | A | 10,77 |
|      | FOXC2   | G | A | 10,77 |
|      | Foxq1   | G | A | 10,69 |
|      | FOXK1   | G | A | 10,29 |
|      | FOXI1   | G | A | 10,25 |
|      | FOXO3   | G | A | 10,21 |
|      | SOX9    | G | A | 10,18 |
|      | Foxo1   | G | A | 10,00 |
|      | HOXB13  | G | A | 9,95  |
|      | FOXP1   | G | A | 9,92  |
|      | FOXD1   | G | A | 9,73  |
|      | Sox17   | G | A | 9,67  |
|      | SOX13   | G | A | 9,38  |
|      | ONECUT3 | G | A | 9,37  |
|      | Hmx1    | G | A | 8,69  |

continuation

|         |         |      |      |      |
|---------|---------|------|------|------|
| -513    | Hoxd8   | G    | A    | 8,63 |
|         | POU4F1  | G    | A    | 8,55 |
|         | ONECUT2 | G    | A    | 8,33 |
|         | HOXD13  | G    | A    | 8,26 |
|         | MNX1    | G    | A    | 8,22 |
|         | Sox6    | G    | A    | 8,06 |
|         | LMX1B   | G    | A    | 8,05 |
|         | FOXC1   | G    | A    | 7,95 |
|         | Foxa2   | G    | A    | 7,60 |
|         | Hoxd8   | G    | A    | 7,51 |
|         | FOXB1   | G    | A    | 7,31 |
|         | POU6F1  | G    | A    | 7,14 |
|         | POU6F1  | G    | A    | 7,14 |
|         | POU4F3  | G    | A    | 7,12 |
|         | Hoxd8   | G    | A    | 6,94 |
|         | ZNF384  | G    | A    | 6,82 |
|         | NKX6-2  | G    | A    | 6,79 |
|         | POU4F3  | G    | A    | 6,72 |
|         | FOXA1   | G    | A    | 6,66 |
|         | ESX1    | G    | A    | 6,53 |
| ONECUT1 | G       | A    | 6,51 |      |
| Prrx2   | G       | A    | 6,46 |      |
| POU4F1  | G       | A    | 6,43 |      |
| POU4F1  | G       | A    | 6,42 |      |
| Foxd3   | G       | A    | 6,33 |      |
| Arid5a  | G       | A    | 6,26 |      |
| Nobox   | G       | A    | 6,14 |      |
| FOXC2   | G       | A    | 6,14 |      |
| Arid3b  | G       | A    | 6,12 |      |
| -513    | Barhl1  | G    | 6,88 | A    |
|         | Barhl1  | G    | 6,69 | A    |
|         | GATA5   | G    | 6,65 | A    |
|         | CUX1    | G    | 6,54 | A    |
|         | BARHL2  | G    | 6,52 | A    |
|         | GATA3   | G    | 6,50 | A    |
|         | Hoxa11  | G    | 6,37 | A    |
| Dlx1    | G       | 6,32 | A    |      |
